# Supplementary material for: Aldehyde allylation with allylboronates providing α-addition products
Source: Royal Society of Chemistry journal article supplement (doi:10.1039/b924527h), 2010-01-01
Supplement: b924527h.pdf [file b924527h.pdf]

# **Aldehyde Allylation with Allylboronates Providing $\alpha$ -Addition Products**

Shū Kobayashi,\* Toshimitsu Endo, Uwe Schneider, Masaharu Ueno

*Department of Chemistry, School of Science and Graduate School of Pharmaceutical  
Sciences, the University of Tokyo, The HFRE Division, ERATO, Japan Science  
Technology Agency (JST), Hongo, Bunkyo-ku, Tokyo 110-0033, Japan.*

## **Electronic Supplementary Information**

## *Experimental*

### **General**

NMR spectra were recorded on a JEOL ECX-600 or ECX-500 spectrometer, operating at 600 MHz or 500 MHz for  $^1\text{H}$  and 150 MHz or 125 MHz for  $^{13}\text{C}$  NMR in  $\text{CDCl}_3$  unless otherwise noted. Tetramethylsilane (TMS) served as the internal standard ( $\delta = 0$ ) for  $^1\text{H}$  NMR and  $\text{CDCl}_3$  was used as the internal standard ( $\delta = 77.0$ ) for  $^{13}\text{C}$  NMR. IR spectra were measured using a JASCO FT/IR-610 spectrometer. High Resolution Mass Spectra (HRMS) were recorded using a JEOL JMS-T100TD (DART) spectrometer or Bruker Daltonics BioTOF II spectrometer (ESI). Preparative thin-layer chromatography (PTLC) was carried out using Wakogel B-5F from Wako Pure Chemical Industries, Ltd. Deionized water from a MILLIPORE MilliQ machine (Gradient A 10) was used as solvent without further treatment. All organic solvents used were commercially available dry solvents, which were distilled appropriately under an argon atmosphere or were stored over molecular sieves prior to use. All aldehydes in this study were commercially available and were distilled prior to use.  $\alpha$ -Substituted allylboronates **2a–d** were prepared by slightly modified procedures of reported methods.<sup>1</sup> Zinc hydroxide (99.9%, powder) was purchased from Soekawa Chemicals Co. Ltd.

### **Typical Experimental Procedure for Allylation Reaction in Aqueous Media (Table 2, entry 1):**

To a 30 mL-round-bottomed flask with magnetic stirring bar were added zinc hydroxide

(2.0 mg, 0.02 mmol) and 2,9-dimethyl-1,10-phenanthroline (**3c**, 5.0 mg, 0.024 mmol). After addition of water (3.2 mL) and acetonitrile (12.8 mL), the mixture was stirred for 30 min at room temperature. To the mixture were added successively benzaldehyde (**1a**; 41  $\mu$ L, 0.4 mmol) and  $\alpha$ -methyl-substituted allylboronate (**2a**; 97  $\mu$ L, 0.48 mmol). The reaction mixture was further stirred at room temperature for 1 h, before adding an aqueous sat. NaHCO<sub>3</sub> solution. The aqueous phase was extracted with ethyl acetate (three times), washed with brine, and the combined organic layers were dried (Na<sub>2</sub>SO<sub>4</sub>). After filtration and concentration *in vacuo*, the regio- and diastereoselectivities were determined by <sup>1</sup>H NMR analysis of the crude sample, which was then purified by preparative thin-layer chromatography (*n*-hexane/ethyl acetate = 4:1) to afford the corresponding homoallylic alcohol **4a** (83% yield,  $\alpha/\gamma = >98/<2$ , *syn/anti* = 94/6).

#### Analytical Data for Homoallylic Alcohols **4a–n**

Homoallylic alcohols **4a**,<sup>2</sup> **4b**,<sup>3</sup> **4c**,<sup>2</sup> **4d**,<sup>2</sup> **4e**,<sup>3</sup> **4f**,<sup>2</sup> **4h**,<sup>13</sup> **4i**,<sup>5</sup> **4k**,<sup>6</sup> **4l**,<sup>4</sup> **4m**,<sup>7</sup> **4n**,<sup>8</sup> (1*S*,2*R*)-**4a**,<sup>9</sup> and **11**<sup>10</sup> are literature-known; obtained analytical data for these compounds were in full agreement with reported data. Products **4g** and **4j** are new compounds; analytical data are as follows.

**4g**:

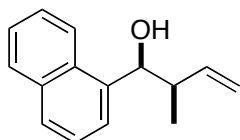

IR (neat): 778, 1217, 1511, 1597, 1639, 3429 cm<sup>-1</sup>.

<sup>1</sup>H NMR *syn*: 0.97 (d, 3H, *J* = 6.8 Hz), 2.12 (s, 1H), 2.77-2.81 (m, 1H), 5.08 (dd, 2H, *J*

= 10.3, 17.4 Hz), 5.42 (d, 1H,  $J = 4.5$  Hz), 5.94 (ddd, 1H,  $J = 6.8, 10.3, 17.4$  Hz), 7.41-7.49 (m, 3H), 7.61 (d, 1H,  $J = 6.8$  Hz), 7.74 (d, 1H,  $J = 8.5$  Hz), 7.84 (dd, 1H,  $J = 7.4, 8.2$  Hz), 7.99 (d, 1H,  $J = 8.5$  Hz).

$^{13}\text{C}$  NMR *syn*: 12.8, 43.1, 73.3, 115.0, 123.0, 123.9, 125.2, 125.2, 125.3, 125.8, 127.7, 128.9, 133.6, 138.3, 141.2.

HRMS:  $\text{C}_{15}\text{H}_{16}\text{O}$ ; calc: 195.11738 ( $\text{M}-\text{OH}$ )<sup>+</sup>; found: 195.11757.

**4j**:

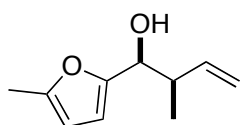

IR (neat): 786, 915, 1018, 1220, 1564, 1640, 3413  $\text{cm}^{-1}$ .

$^1\text{H}$  NMR *syn*: 1.08 (d, 3H,  $J = 6.8$  Hz), 1.99 (d, 1H,  $J = 5.7$  Hz), 2.27 (s, 3H), 2.65-2.73 (m, 1H), 4.48 (dd, 1H,  $J = 4.0, 7.9$  Hz), 5.08 (ddd, 2H,  $J = 1.7, 10.2, 17.6$  Hz), 5.77 (ddd, 1H,  $J = 7.4, 10.2, 17.6$  Hz), 5.89-5.91 (m, 1H), 6.09 (d, 1H,  $J = 2.8$  Hz). *anti*: 0.94 (d, 3H,  $J = 6.8$  Hz), 2.09 (d, 1H,  $J = 4.0$  Hz), 2.29 (s, 3H), 2.65-2.73 (m, 1H), 4.33 (dd, 1H,  $J = 5.9, 5.9$  Hz), 5.21 (ddd, 2H,  $J = 1.7, 10.1, 17.9$  Hz), 5.81 (ddd, 1H,  $J = 7.8, 10.1, 17.9$  Hz), 5.89-5.91 (m, 1H), 6.13 (d, 1H,  $J = 3.4$  Hz).

$^{13}\text{C}$  NMR *syn*: 13.5, 15.1, 42.9, 71.4, 105.9, 107.7, 115.7, 139.8, 151.5, 152.9. *anti*: 13.6, 16.4, 43.5, 71.4, 105.9, 108.3, 117.0, 140.3, 151.8, 153.4.

HRMS:  $\text{C}_{10}\text{H}_{14}\text{O}_2$ ; calc: 149.09664 ( $\text{M}-\text{OH}$ )<sup>+</sup>; found: 149.09604.

**4m**: (NMR data were partially reported<sup>7</sup>)

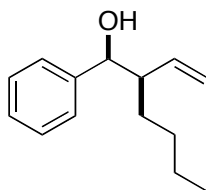

IR (neat): 702, 762, 915, 1039, 1454, 1604, 1640, 2860, 3069, 3417  $\text{cm}^{-1}$ .

$^1\text{H}$  NMR *syn*: 0.85 (d, 3H,  $J = 7.1$  Hz), 1.11-1.33 (m, 5H), 1.53-1.58 (m, 1H), 2.17-2.20 (m, 1H), 2.35-2.41 (m, 1H), 4.59 (dd, 1H,  $J = 5.1, 5.1$  Hz), 5.01 (ddd, 2H,  $J = 1.7, 10.6, 18.4$  Hz), 5.49 (ddd, 1H,  $J = 9.5, 10.6, 18.4$  Hz), 7.22-7.34 (m, 5H). *anti*: 0.79 (d, 3H,  $J = 6.8$  Hz), 1.11 (m, 5H), 1.70-1.74 (m, 1H), 2.17-2.20 (m, 1H), 2.24-2.30 (m, 1H), 4.37 (dd, 1H,  $J = 2.3, 7.4$  Hz), 5.22 (ddd, 2H,  $J = 1.7, 10.1, 18.4$  Hz), 5.64 (ddd, 1H,  $J = 8.9, 10.1, 18.4$  Hz), 7.22-7.34 (m, 5H).

$^{13}\text{C}$  NMR *syn*: 13.9, 22.6, 29.3, 29.4, 51.4, 76.8, 117.2, 126.7, 127.3, 127.9, 138.6, 142.5.

(*Anti*-adduct was reported.<sup>7b</sup>)

HRMS:  $\text{C}_{14}\text{H}_{20}\text{O}$ ; calc: 187.14868 ( $\text{M}-\text{OH}$ )<sup>+</sup>; found: 187.14779.

### Determination of the Absolute Configuration of Compound **13**<sup>10</sup>

We converted compound **13** into 2,3-dimethylpentane-1,2-diol according to the same procedure as shown in Ref. 11 (Scheme S-1).

#### Scheme S-1

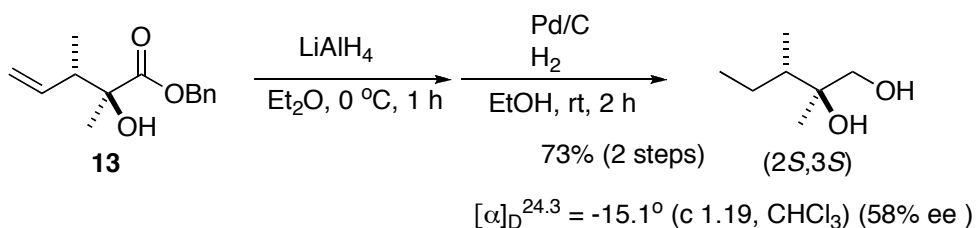

(2*R*,3*R*)-2,3-Dimethylpentane-1,2-diol was independently synthesized according to the same procedure as shown in Ref. 12 (Scheme S-2). Compared with the value of the optical rotation, we determined the absolute configuration of **13** to be 2*S*,3*S*.

### Scheme S-2

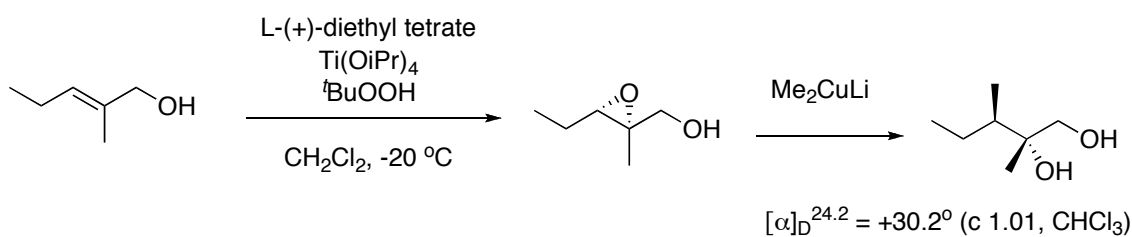

(2*S*,3*S*)-**13**:  $[\alpha]_{\text{D}}^{23.4} +0.564$  (c = 1.35,  $\text{CHCl}_3$ ) (58% *ee*)

(2*S*,3*S*)-2,3-dimethylpentane-1,2-diol:  $[\alpha]_{\text{D}}^{24.3} -15.1$  (c = 1.19,  $\text{CHCl}_3$ ) (58% *ee*)

### References

1. Hoffmann, R. W.; Wolff, J. J. *Chem. Ber.* **1991**, *124*, 563-569.
2. Jing, S.; Agosston, E. G.; Chen, T.; Cabel, M.-P.; Turos, E. *Organometallics* **1995**, *14*, 4697-4709.
3. Bandini, M.; Cozzi, P. G.; Umani-Ronchi, A. *Tetrahedron* **2001**, *57*, 835-843.
4. Only the *anti*-isomer was characterized: Jones, P.; Knochel, P. *J. Org. Chem.* **1999**,

64, 186-195.

5. Tubuki, M.; Matsuo, S.; Honda, T. *Heterocycles* **2005**, *66*, 535-542.

6. Kobayashi, S.; Nishio, K. *J. Org. Chem.* **1994**, *59*, 6620-6628.

7. (a) Takeda, T.; Miura, I.; Horikawa, Y.; Fujiwara, T. *Tetrahedron Lett.* **1995**, *36*, 1495-1498. (b) Seebach, D.; Widler, L. *Helv. Chim. Acta* **1982**, *65*, 1972-1981.

8. Hirashita, T.; Kambe, S.; Tsuji, H.; Omori, H.; Araki, S. *J. Org. Chem.* **2004**, *69*, 5054-5059.

9. Kotani, S.; Hashimoto, S.; Nakajima, M. *Tetrahedron* **2007**, *63*, 3122-3132.

10. (a) Yamamoto, Y.; Maruyama, K.; Komatsu, T.; Ito, W. *J. Org. Chem.* **1986**, *51*, 886-891. (b) Yamada, K.; Tozawa, T.; Nishida, M.; Mukaiyama, T. *Bull. Chem. Soc. Jpn.* **1997**, *70*, 2301-2308.

11. Chen, Y.; Eltepu, L.; Wentworth, P. Jr. *Tetrahedron Lett.* **2004**, *45*, 8285-8288.

12. Riccio, R.; Santaniello, M.; Squillace, G.; Minale, L. *J. Chem. Soc. Perkin Trans 1* **1989**, 823-826.

13. Fujimoto, K.; Sakai, H.; Nakai, T. *Chem. Lett.* **1993**, 1397.

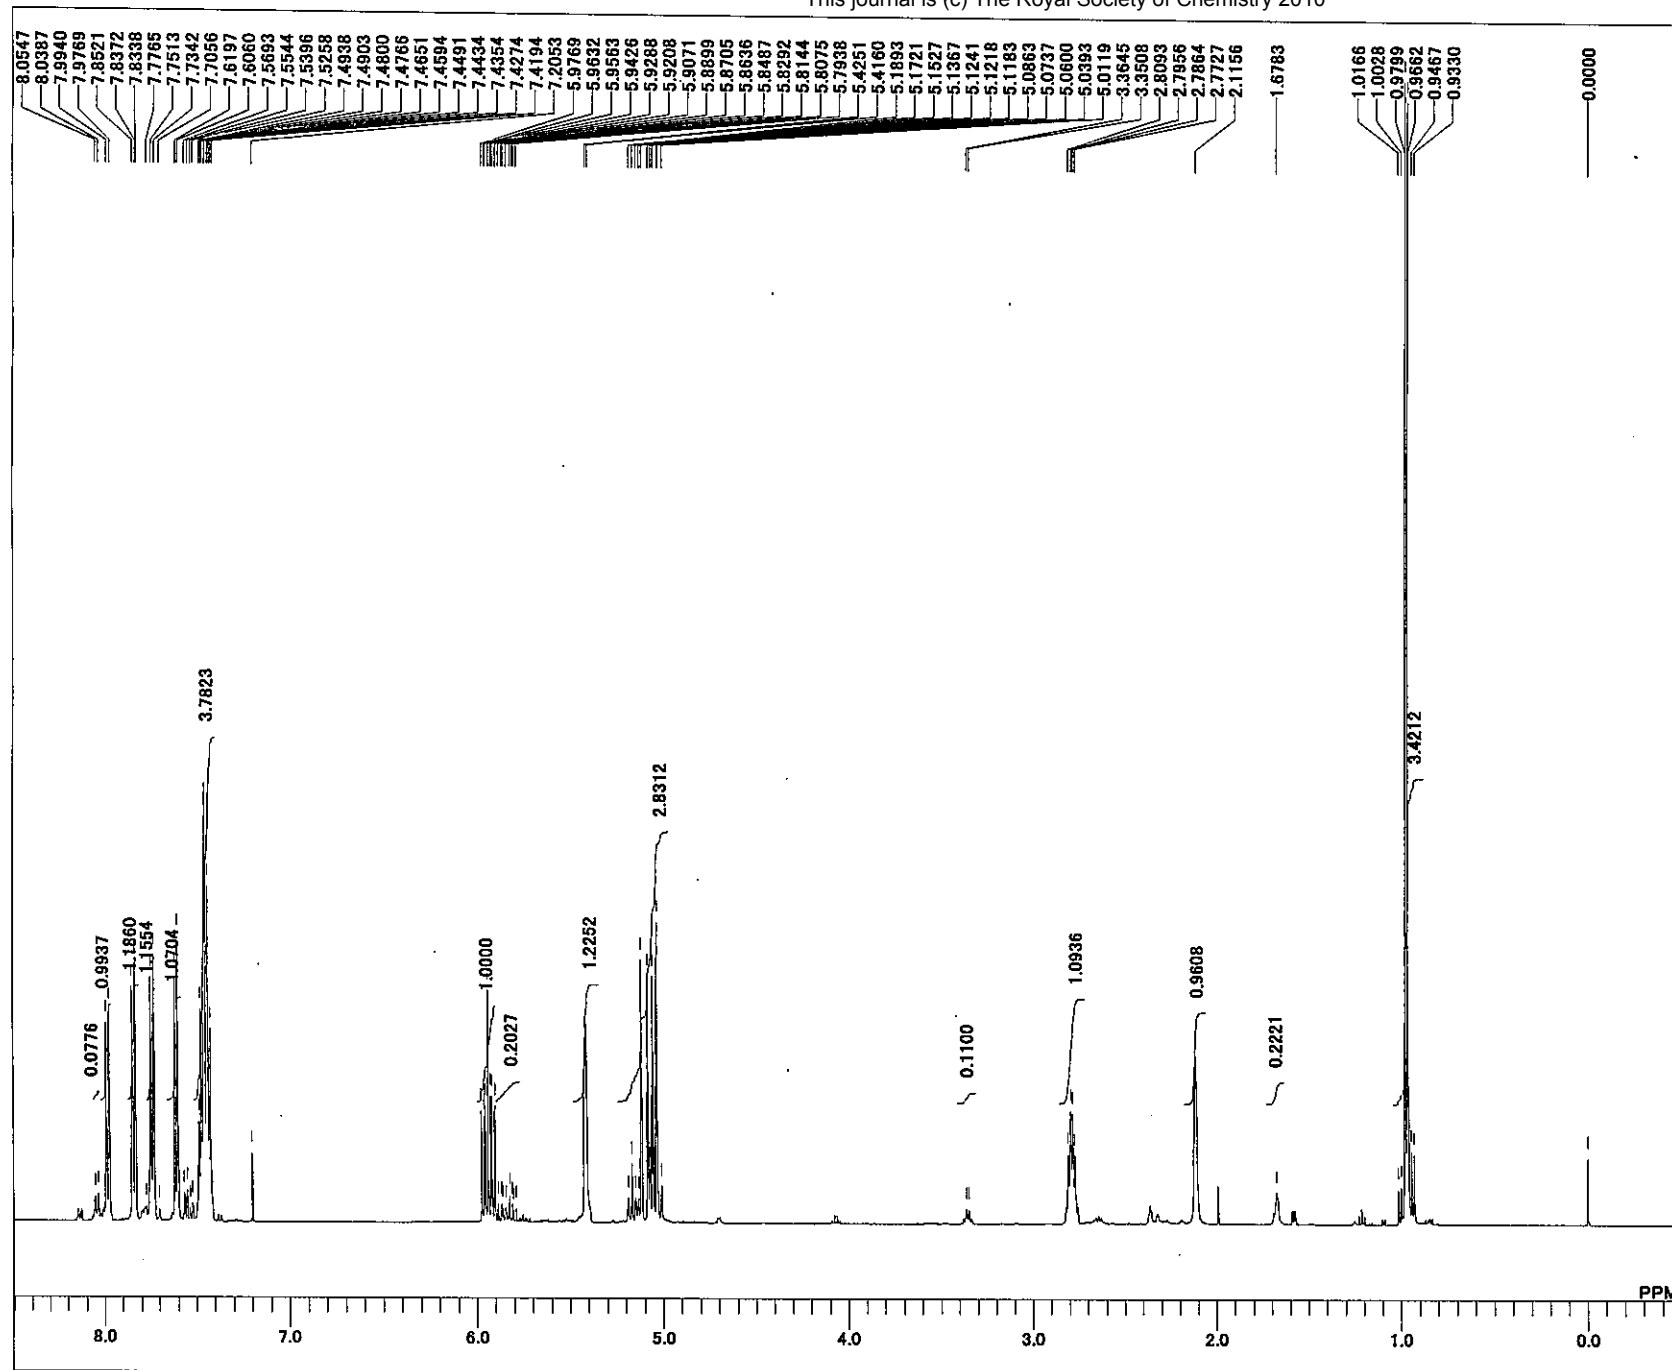

DFILE C:\Documents and Settings\All Users\Doc  
 COMNT 08-07-2009 13:34:55  
 DATIM 1H  
 OBNUC 1H NMR.ex2  
 EXMOD 495.13 MHz  
 OBFRQ 4.38 KHz  
 OBSET 9.64 Hz  
 OBFIN 13107  
 POINT 7429.31 Hz  
 FREQU 8  
 SCANS 1.7642 sec  
 ACQTM 5.0000 sec  
 PD 6.50 usec  
 PW1 1H  
 IRNUC 20.7 c  
 CTEMP CDCL3  
 SLVNT 0.00 ppm  
 EXREF 0.12 Hz  
 BF 30  
 RGAIN

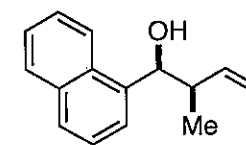

4g



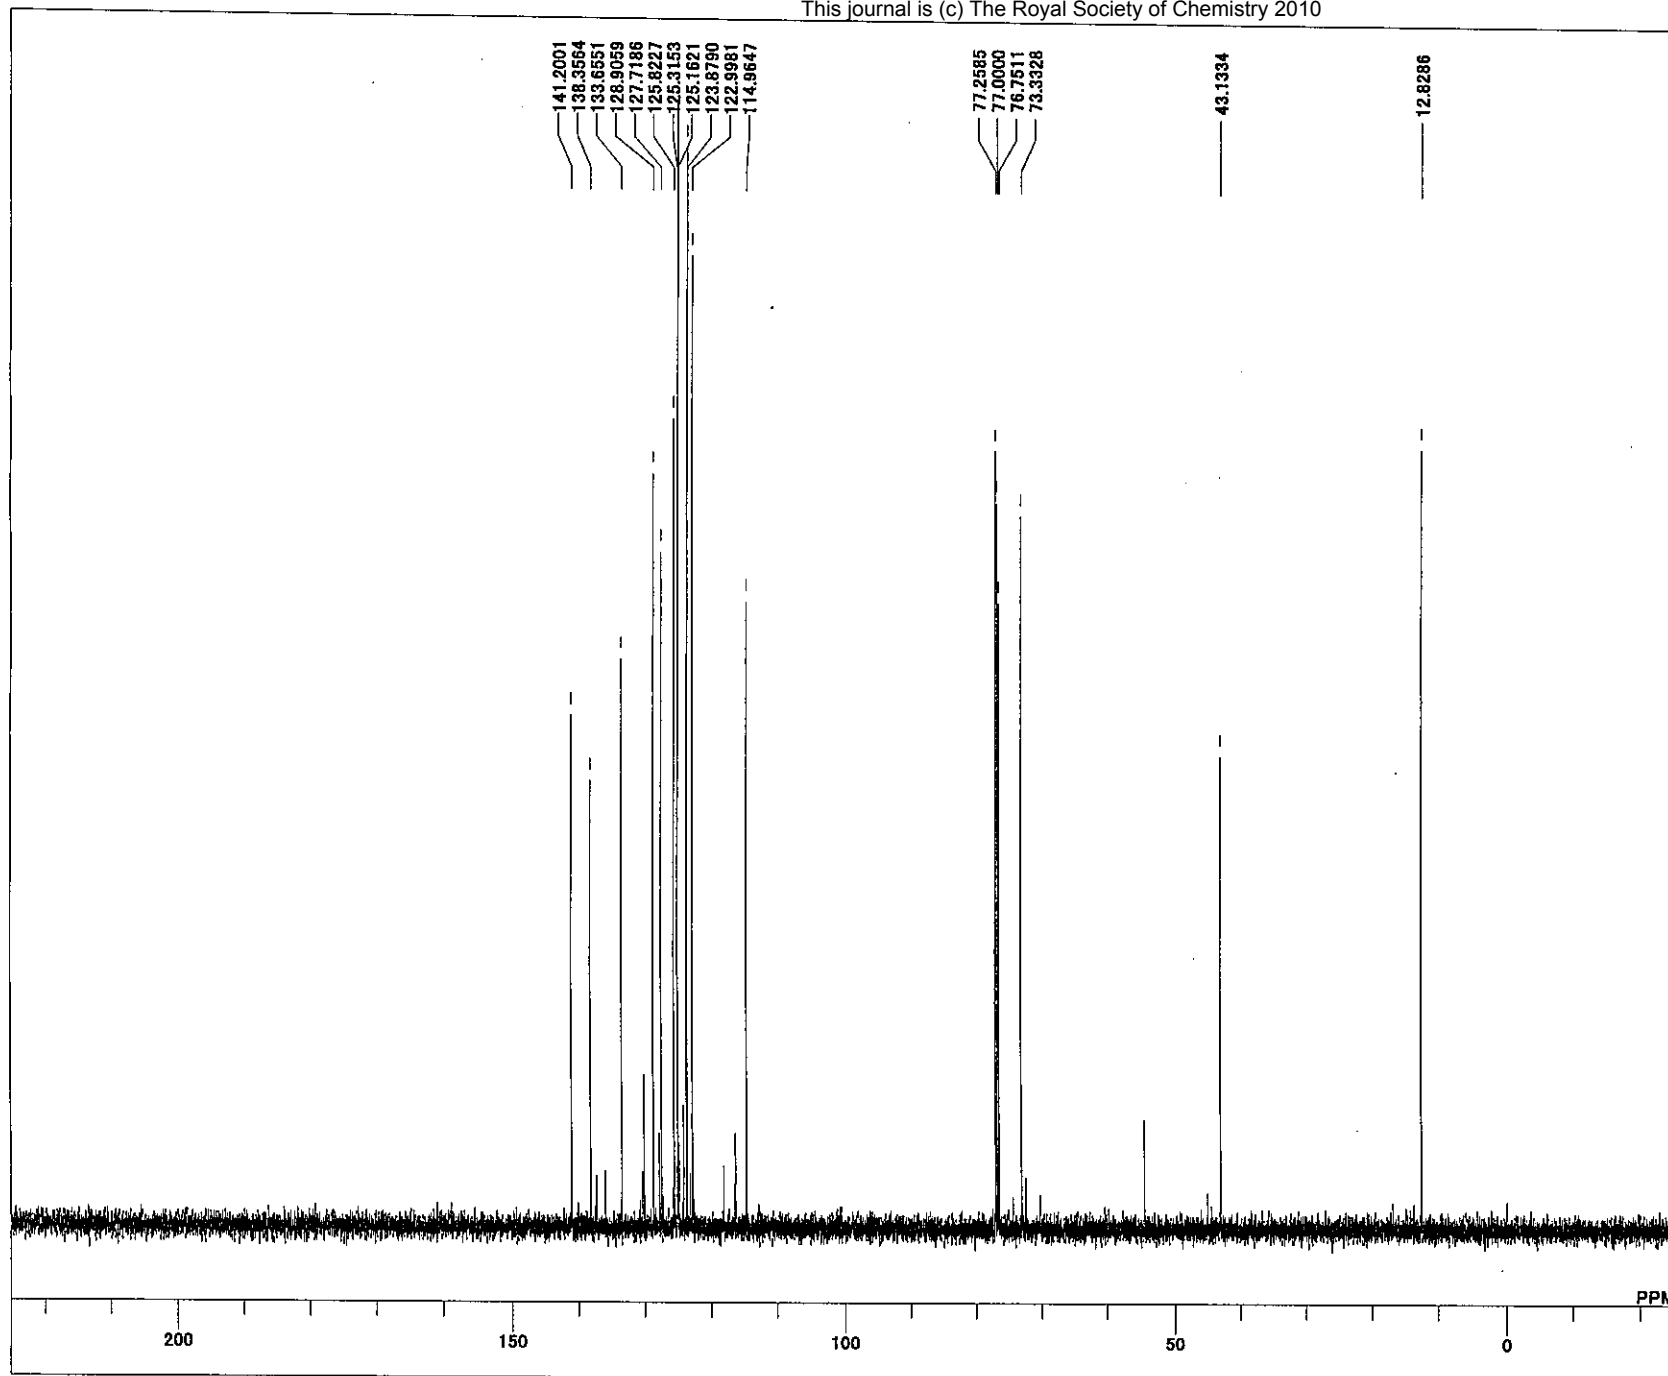

DFILE C:\Documents and Settings\All Users\Doc  
GOMNT 08-07-2009 13:51:06  
DATIM  
OBNUC 13C  
EXMOD 13C NMR.ex2  
OBFRQ 124.51 MHz  
OBSET 3.45 KHz  
OBFIN 6.00 Hz  
POINT 26214  
FREQU 31249.52 Hz  
SCANS 148  
ACQTM 0.8389 sec  
PD 2.0000 sec  
PW1 3.67 usec  
IRNUC 1H  
CTEMP 21.2 c  
SLVNT CDCL3  
EXREF 77.00 ppm  
BF 0.12 Hz  
RGAIN 50

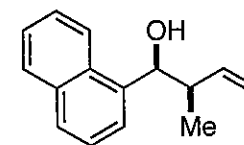

4g

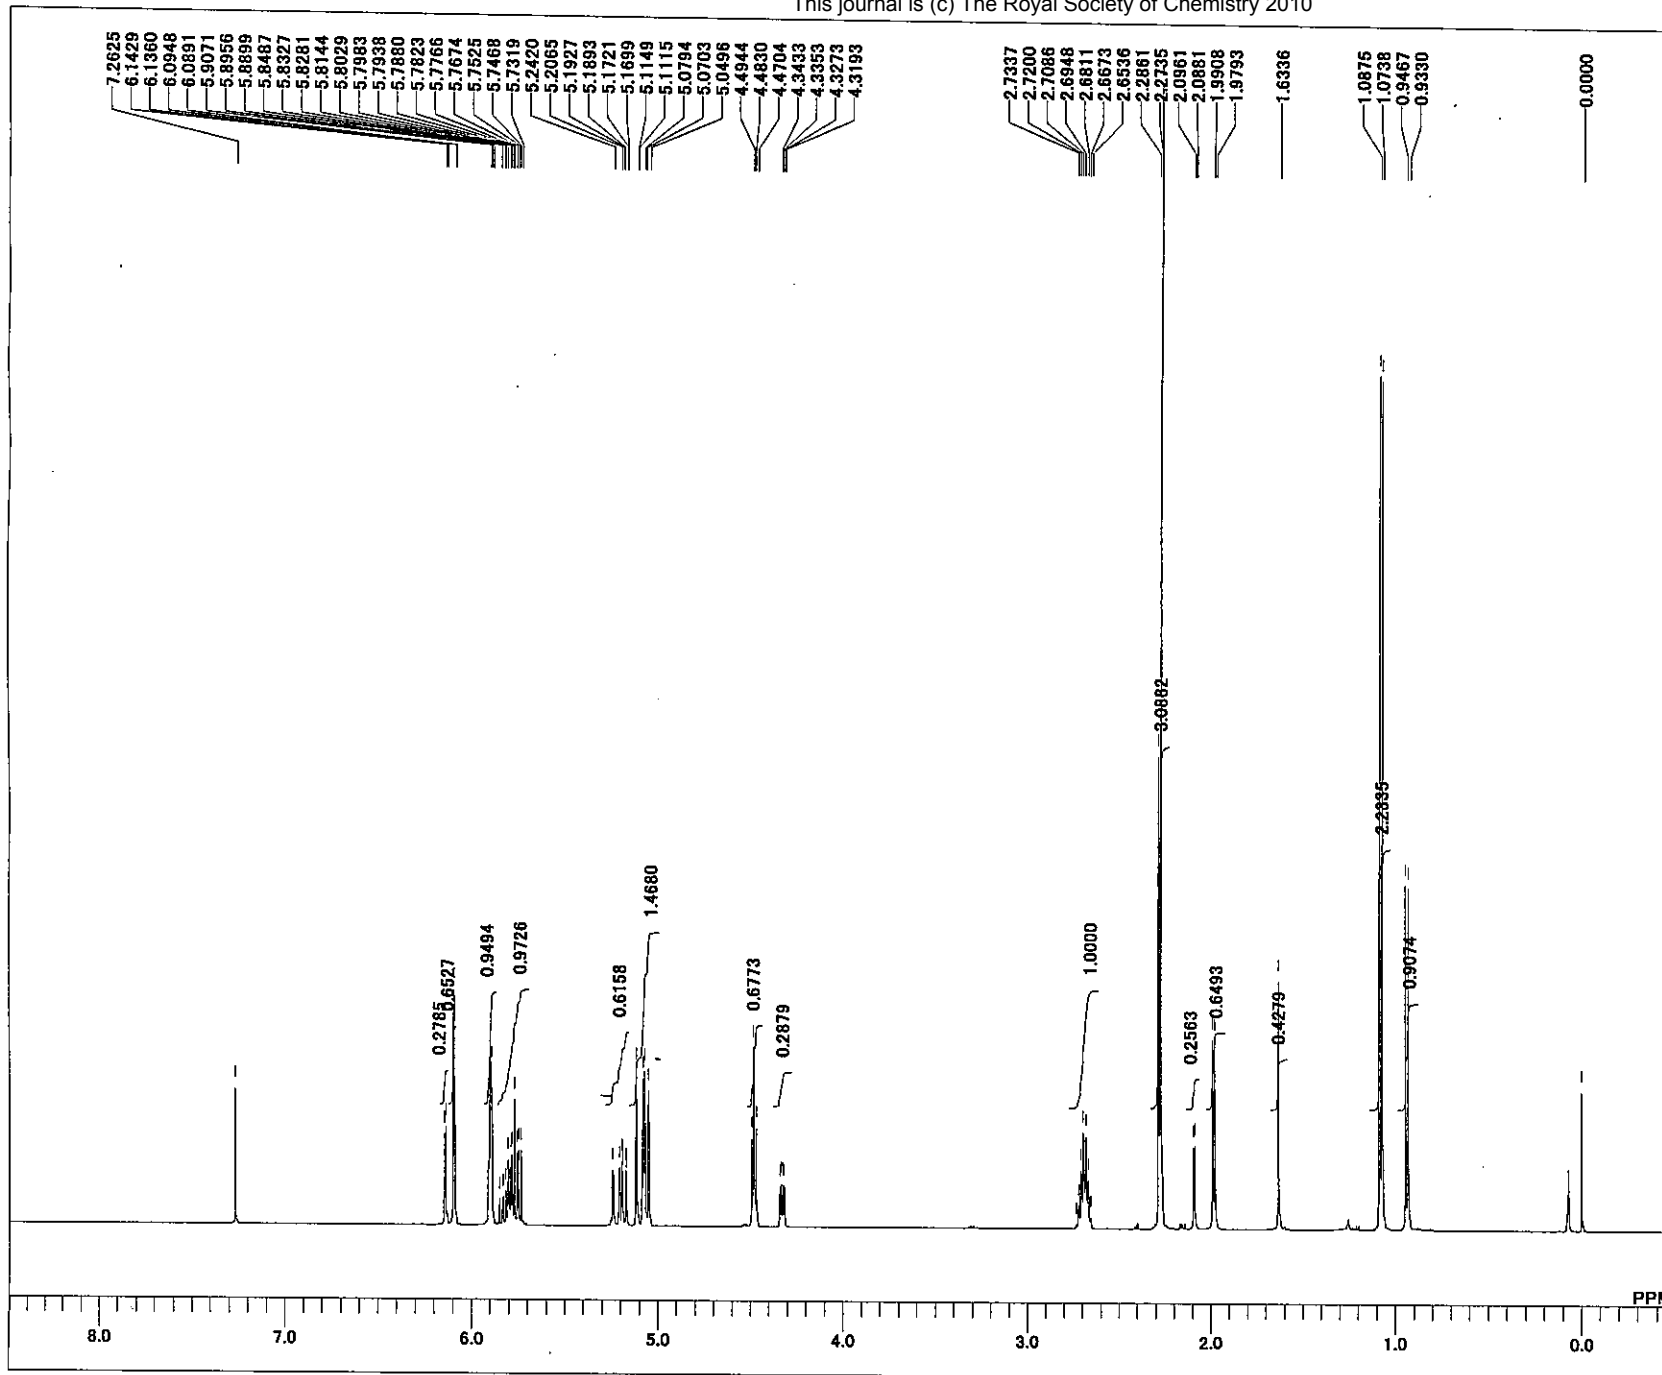

DFILE C:\Documents and Settings\All Users\Doc  
 COMNT 10-07-2009 20:39:47  
 DATIM 1H  
 OBNUC 1H NMR.ex2  
 EXMOD 495.13 MHz  
 OBFREQ 4.38 KHz  
 OBSET 9.64 Hz  
 OBFIN 13107  
 POINT 7429.31 Hz  
 FREQU 8  
 SCANS 1.7642 sec  
 ACQTM 5.0000 sec  
 PD 6.50 usec  
 PW1 1H  
 IRNUC 21.9 c  
 CTEMP CDCL3  
 SLVNT 0.00 ppm  
 EXREF 0.12 Hz  
 BF 40  
 RGAIN

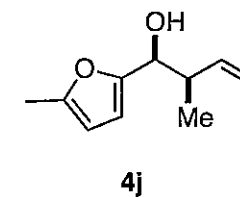

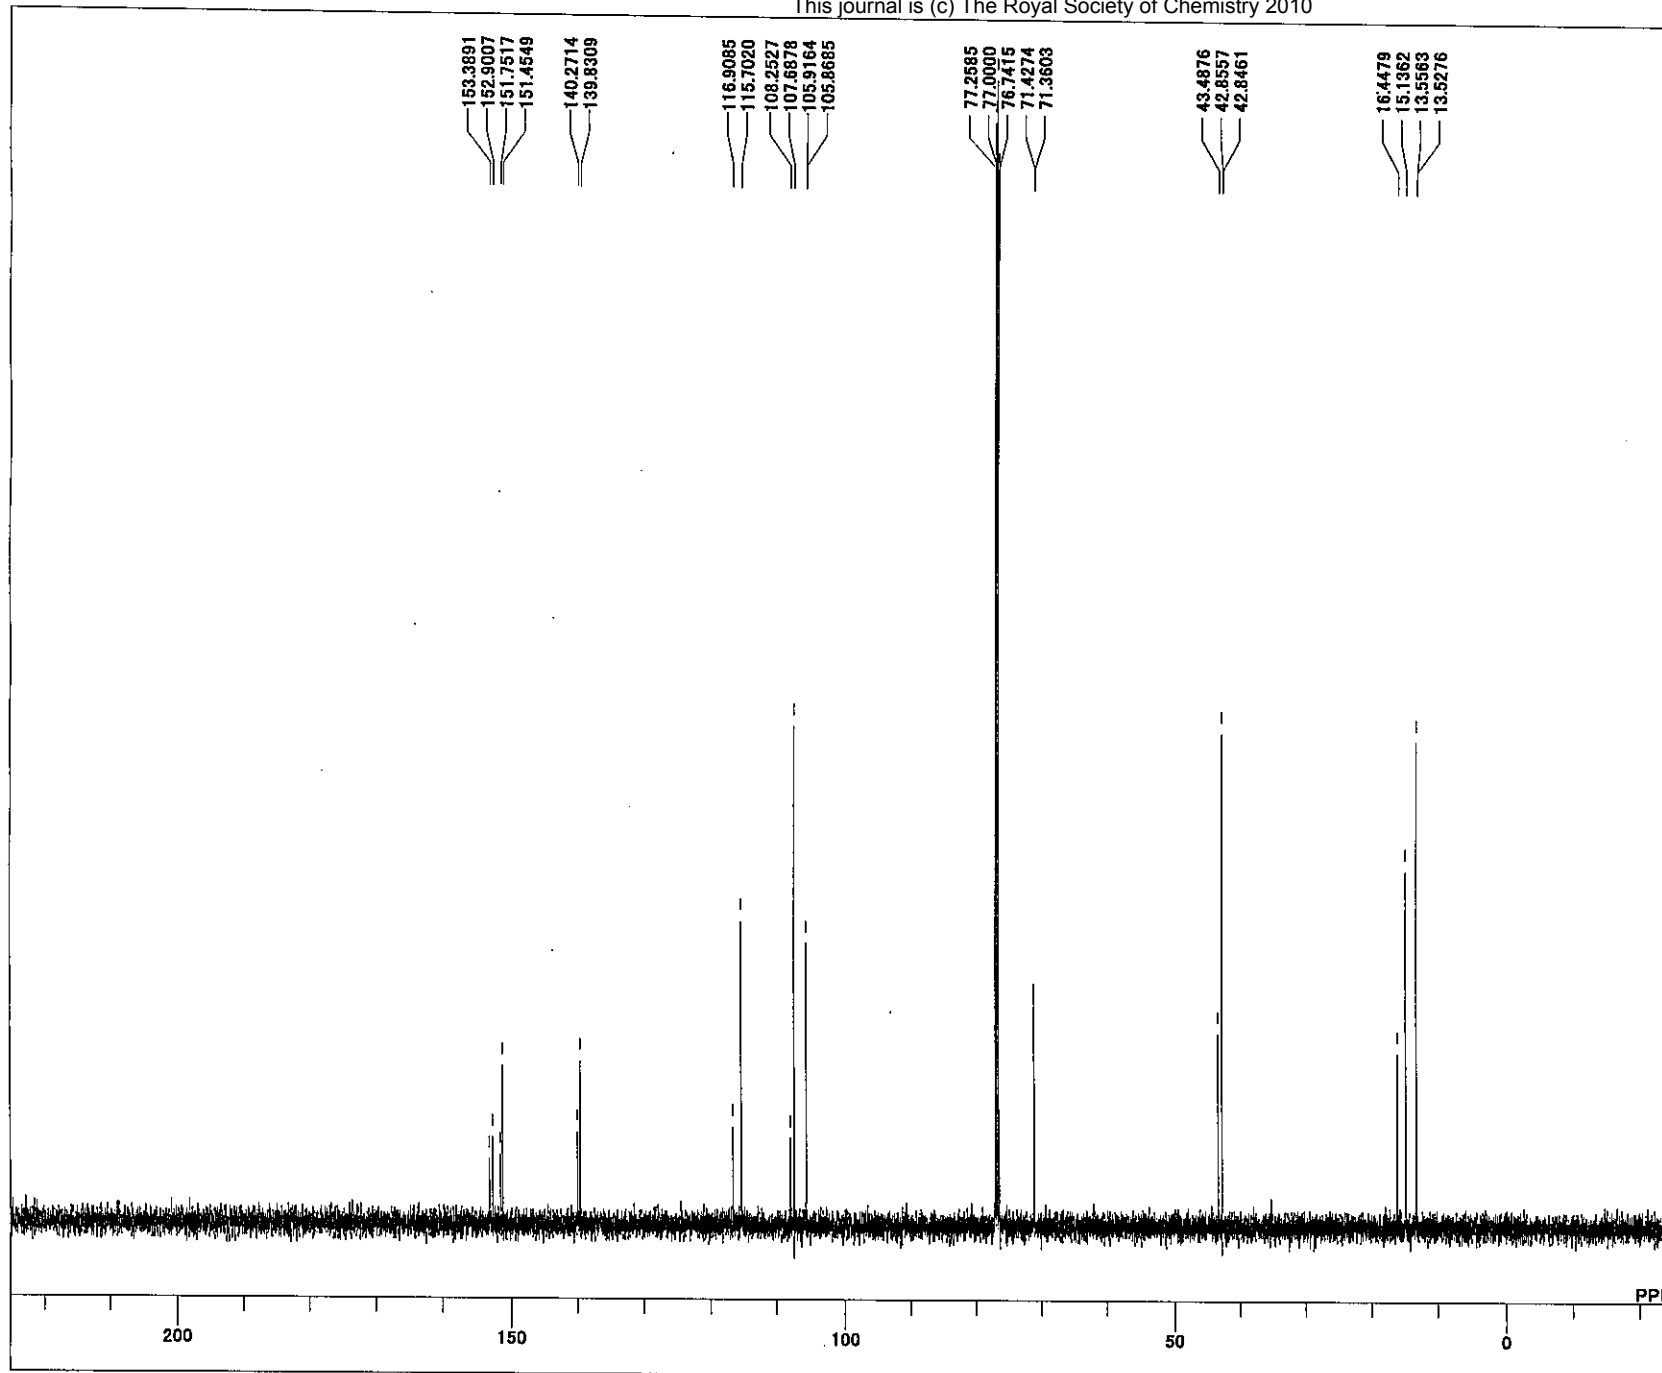

DFILE C:\Documents and Settings\All Users\Doc  
COMNT 10-07-2009 20:53:15  
DATIM 13C  
OBNUC 13C NMR.ex2  
EXMOD 124.51 MHz  
OBFREQ 3.45 KHz  
OBSET 6.00 Hz  
OBFIN 26214  
POINT 31249.52 Hz  
FREQU 268  
SCANS 0.8389 sec  
ACQTM 2.0000 sec  
PD 3.67 usec  
PW1 1H  
IRNUC 22.5 c  
CTEMP CDCL3  
SLVNT 77.00 ppm  
EXREF 0.12 Hz  
BF 48  
RGAIN

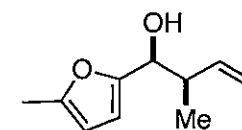

4j
